# Supplementary material
Source: MDPI journal article supplement (https://www.mdpi.com/2673-9976/6/1/53)
Supplement: s1 [file s1]

# Effects of cleaning procedures on the concentration of pesticide residues on crisp fresh-cut lettuce (cv. Vera)

Noel Alonzo, Hugo do Carmo, Ana P. Paullier, Inés Santos, Brian de Mattos, Magdalena Irazoqui, Lucía Pareja.

Departamento de Química del Litoral, Centro Universitario Regional Litoral Norte, Universidad de la República, Paysandú, Uruguay.

nalonzo@fq.edu.uy

## Introduction

Consumption of ready-to-eat vegetables has increased due to new trends in diet and lifestyle, thus having an impact on both commercial and domestic environments. Pesticide usage during large-scale production of fruits and vegetables can be problematic as its presence, though useful for preventing plagues and diseases, should be closely monitored along the whole process to ensure the safety of the product. Each part of the process needs to be taken into consideration, particularly the post-harvest stages<sup>1,2</sup>. Non-thermic treatments, like ultrasound baths, are being used as an alternative for disinfection which have the potential to lower pesticide residues. Ultrasound in particular is a safe, non-toxic and clean technology that allows for scaling and continuous design, therefore it is already being used at industrial level.<sup>3</sup> On the other hand, there are "domestic" types of cleaning procedures, considered safe and non-toxic, that are not to be forgotten, and also can be attached to industrial scale processes.

## Objective

The aim of this work was to test and compare the effectiveness of different cleaning procedures to reduce pesticide residues on crisp fresh-cut lettuce.

## Methodology

### Field experiment

**Incurred samples:** Two groups of crisp lettuce were cultivated under controlled conditions for 54 days in a greenhouse with daily watering. Group A consisted of 6 lettuces while group B consisted of 64 plants.

#### Pesticide application:

**Group A:** without pesticide application (control).  
**Group B:** Pesticide application according to Good Agricultural Practices.<sup>4</sup>

Selected Pesticides: Chlorpyrifos methyl, Pirimicarb, Imidacloprid, Boscalid, Pyraclostrobin.

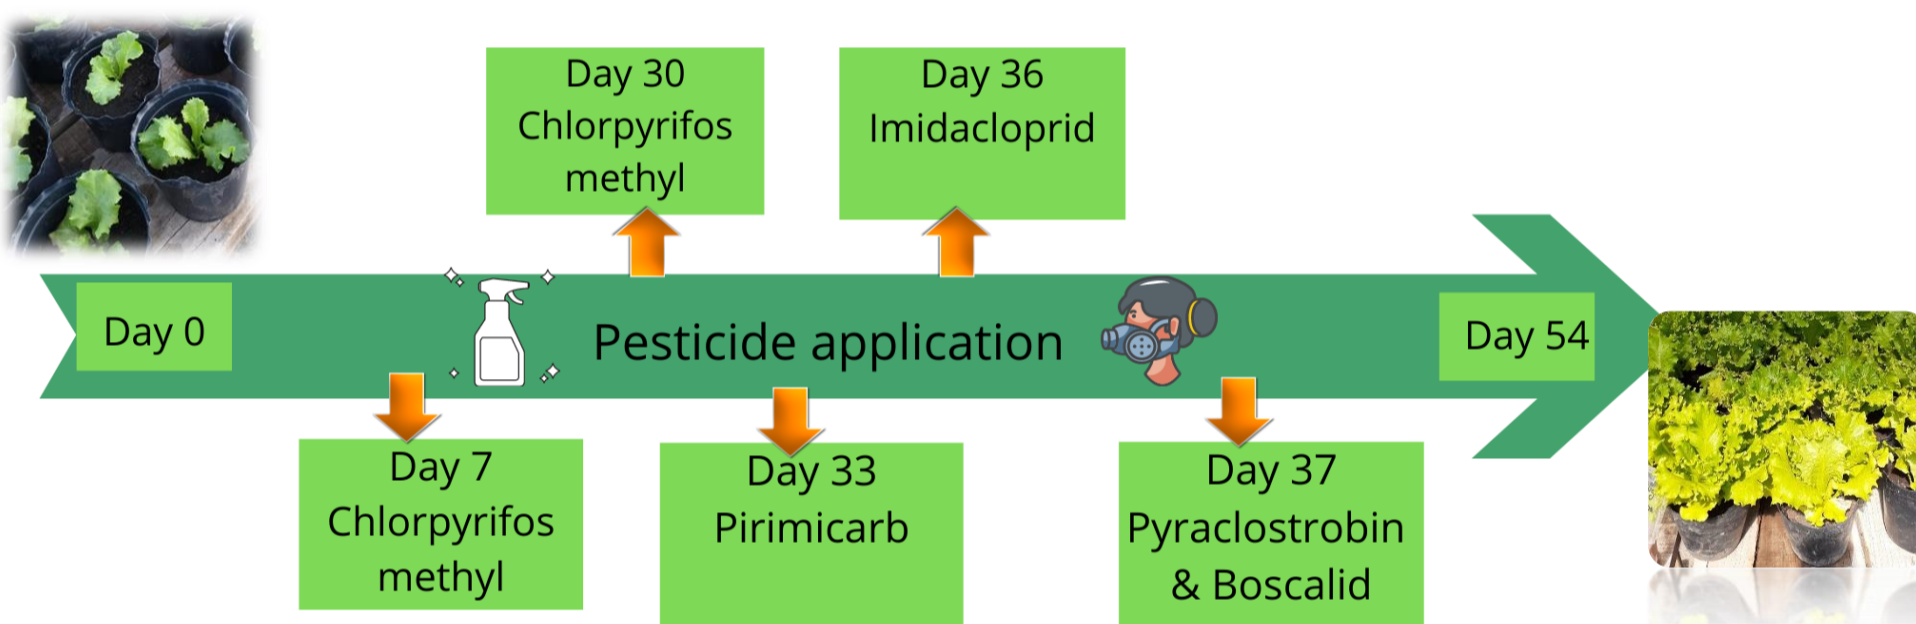

### Treatments

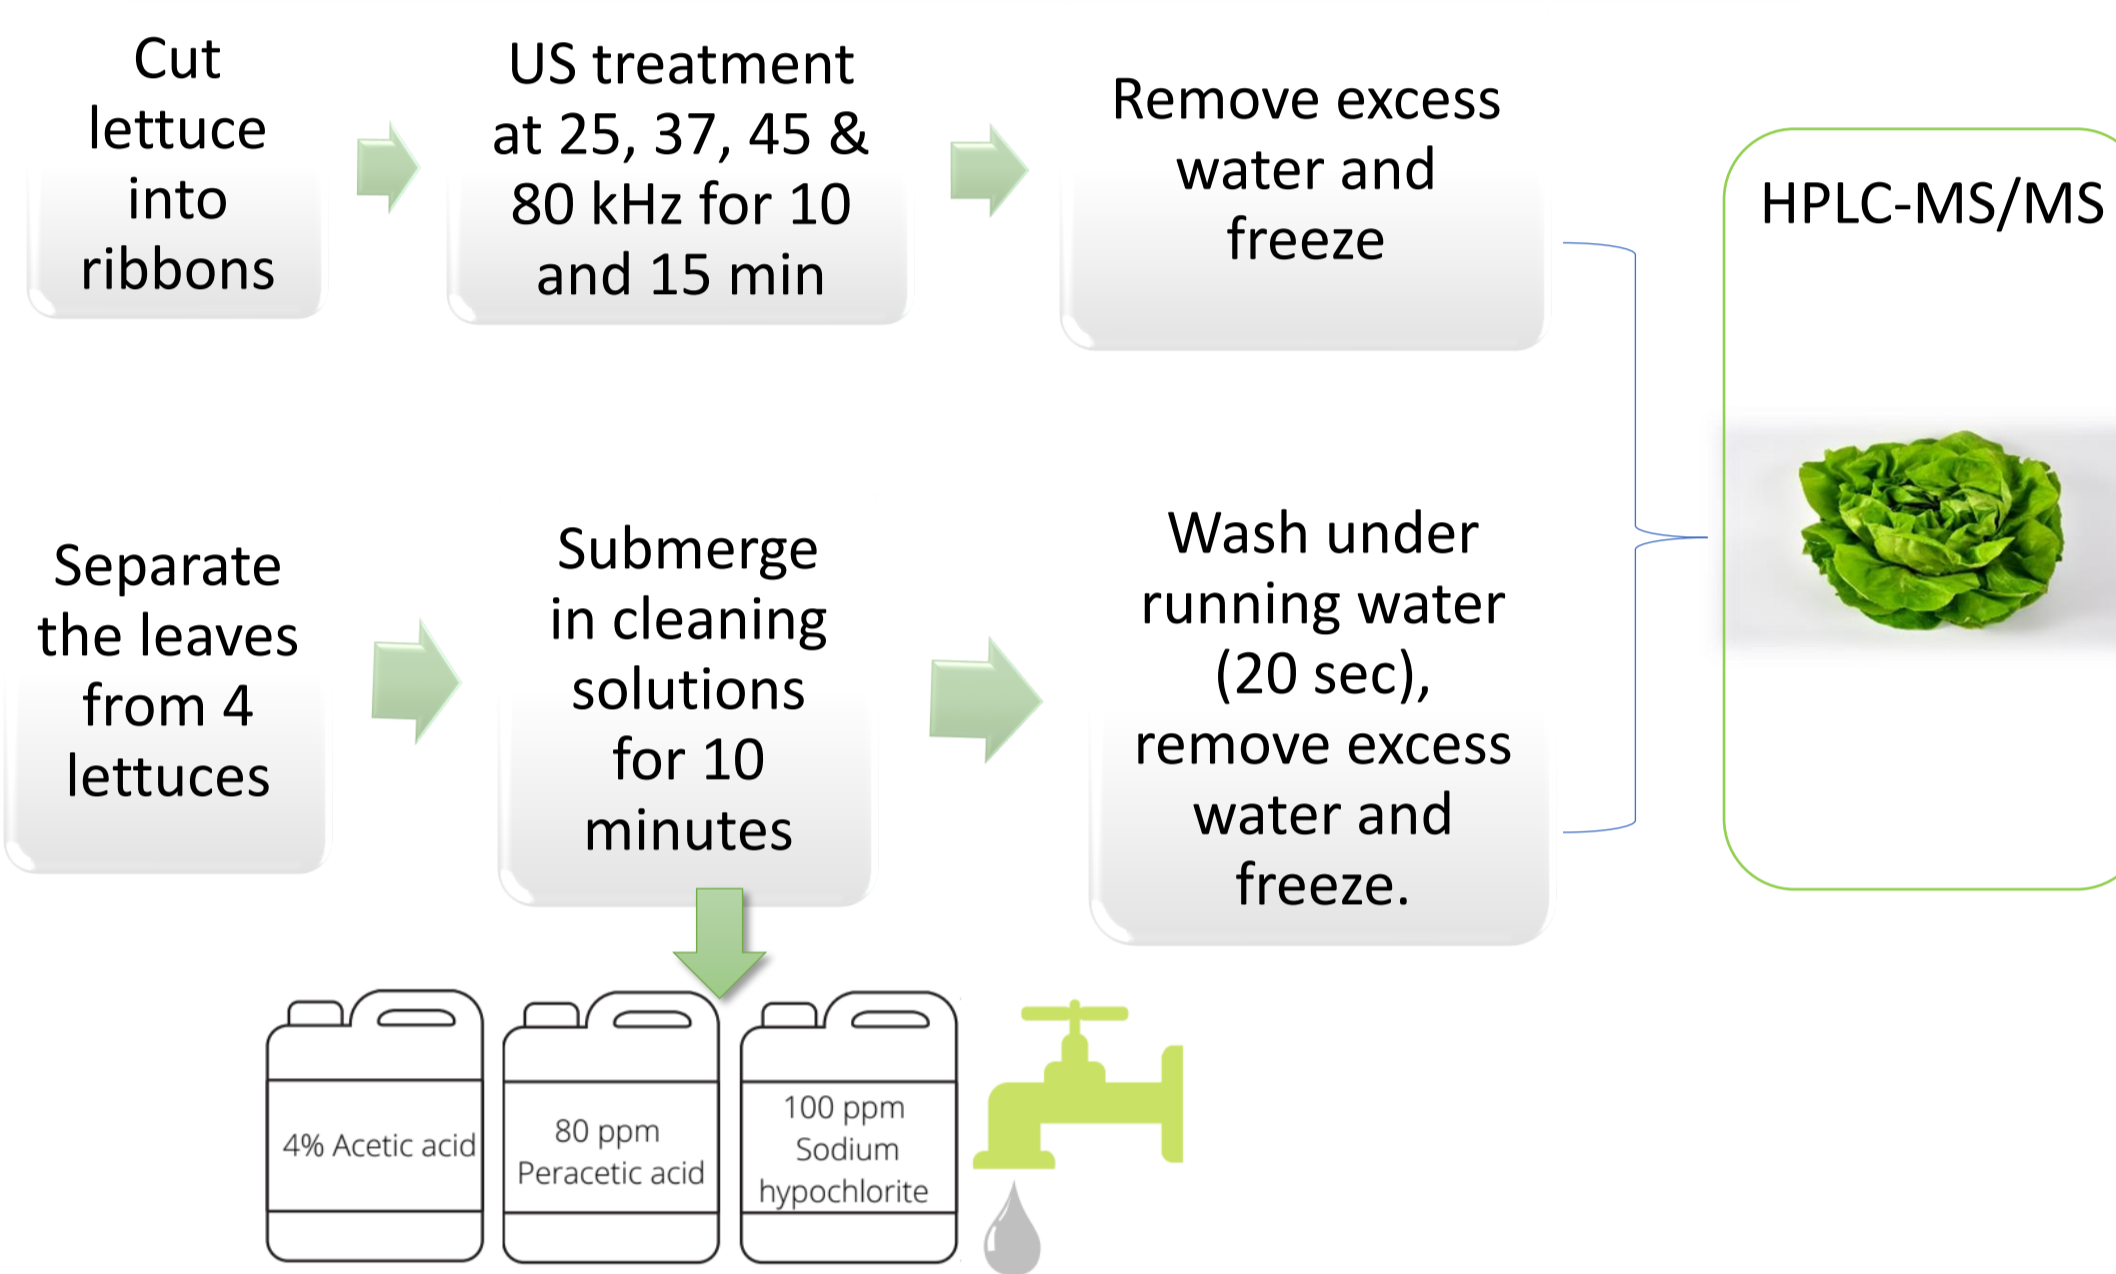

### Sample processing

The samples were cut in pieces and then milled with liquid nitrogen and kept frozen until analysis

### Pesticide extraction (acetate QuEChERS)

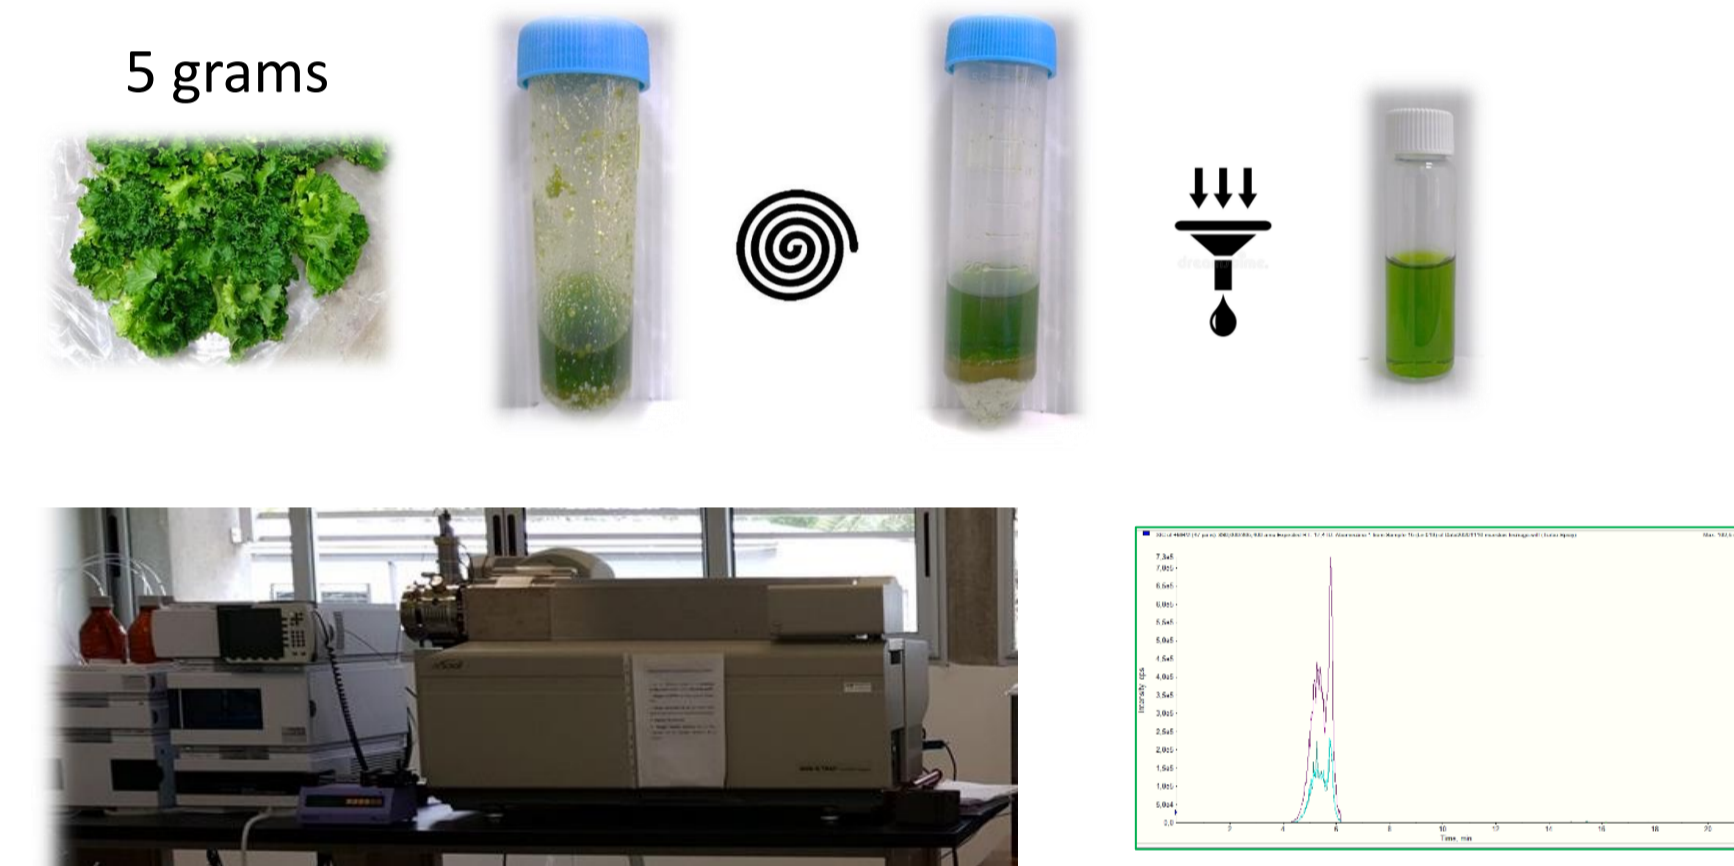

### Commercial samples

22 commercial lettuces were acquired from different shops in Paysandú to evaluate pesticide residues level by HPLC-MS/MS.

## Results and Discussion

A QuEChERS method was developed and validated for the analysis of 16 pesticides widely used in lettuce crops

| Pesticide           | 10 µg/kg |      | 25 µg/kg |      | 50 µg/kg |      |
|---------------------|----------|------|----------|------|----------|------|
|                     | RSD      | %Rec | RSD      | %Rec | RSD      | %Rec |
| Acetamidiprid       | 1        | 87   | 3        | 96   | 2        | 98   |
| Boscalid            | 10       | 92   | 9        | 90   | 2        | 108  |
| Carbendazim         | --       | --   | 3        | 82   | 4        | 83   |
| Chlorpyrifos        | 5        | 112  | 5        | 100  | 3        | 100  |
| Cyromazine          | 4        | 94   | 1        | 88   | 1        | 85   |
| Chlorpyrifos methyl | --       | --   | 8        | 92   | 14       | 117  |
| Dimethoate          | 3        | 97   | 1        | 97   | 1        | 98   |
| Fluvalinate         | 20       | 93   | 17       | 96   | 15       | 101  |
| Imidacloprid        | 11       | 97   | 4        | 94   | 8        | 94   |
| Iprodione           | ---      | ---  | ---      | ---  | 8        | 91   |
| Methomyl            | 4        | 104  | 2        | 96   | 3        | 96   |
| Pirimicarb          | 2        | 101  | 2        | 96   | 1        | 96   |
| Propamocarb         | 2        | 95   | 2        | 91   | 2        | 90   |
| Pyraclostrobin      | --       | --   | 3        | 117  | 4        | 109  |
| Pyrimethanil        | 7        | 95   | 7        | 96   | 4        | 99   |
| Spinosad            | 2        | 102  | 3        | 100  | 3        | 101  |

Table 1: Standard deviation and recovery percentages for all pesticides.

Most pesticides presented a quantitation limit of 10 µg/kg, except for Carbendazim, Chlorpyrifos Methyl and Pyraclostrobin 25 µg/kg and Iprodione 50 µg/kg.

Matrix effect was low (<20%) for most pesticides, except for Carbendazim, therefore this method can be used without the need of a matrix-matched calibration curve.

| Pesticide      | MRL (mg/kg) | M 12 (mg/kg) | M 13 (mg/kg) | M 14 (mg/kg) | M 16 (mg/kg) | M 17 (mg/kg) | M 18 (mg/kg) |
|----------------|-------------|--------------|--------------|--------------|--------------|--------------|--------------|
| Acetamidiprid  | ---         | ND           | ND           | ND           | 0.12         | 0.41         | ND           |
| Boscalid       | ---         | ND           | ND           | ND           | 0.32         | 0.99         | ND           |
| Iprodione      | 10          | ND           | ND           | ND           | 0.05         | 0.13         | ND           |
| Propamocarb    | 100         | 2.5          | 4.2          | 0.03         | ND           | ND           | 10           |
| Pyraclostrobin | 40          | ND           | ND           | ND           | 0.125        | 0.31         | ND           |

Table 2: Results of the positive commercial samples.

Total ion chromatogram obtained through HPLC-MS/MS from a sample.

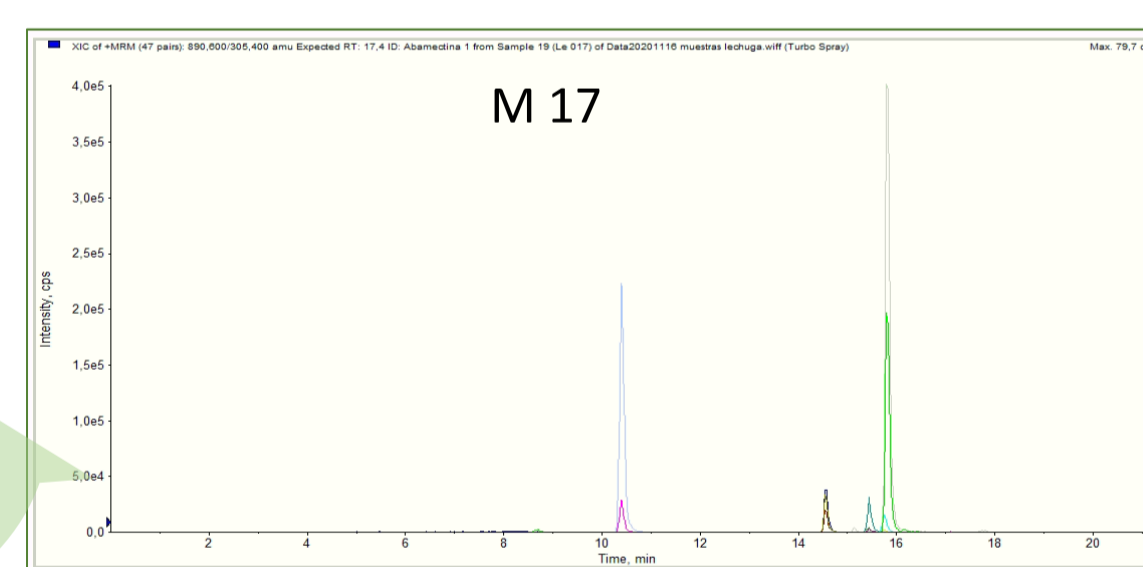

Six out of the 22 commercial samples presented pesticides residues over the LOQ, but all of them were under the MRLs according to de Codex Alimentarius<sup>5</sup>

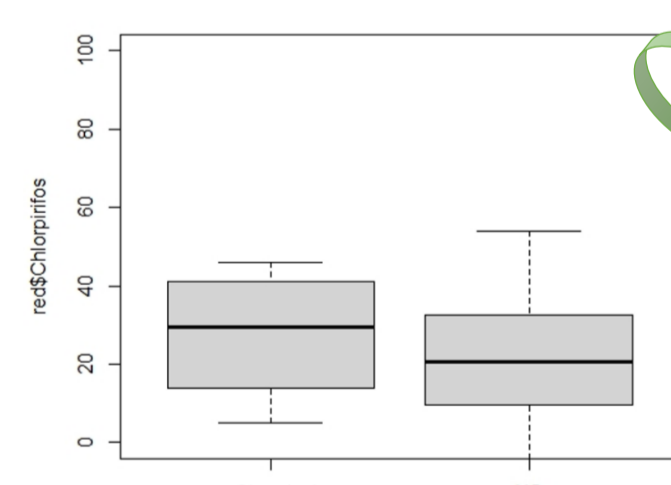

Chlorpyrifos methyl box/plot diagram for domestic and ultrasound treatments.

ANOVA test Pillai-Bartlett with alfa 0.05. The obtained p/value was 0.28, therefore, no significant differences were found.

### Single Hierarchical Clustering

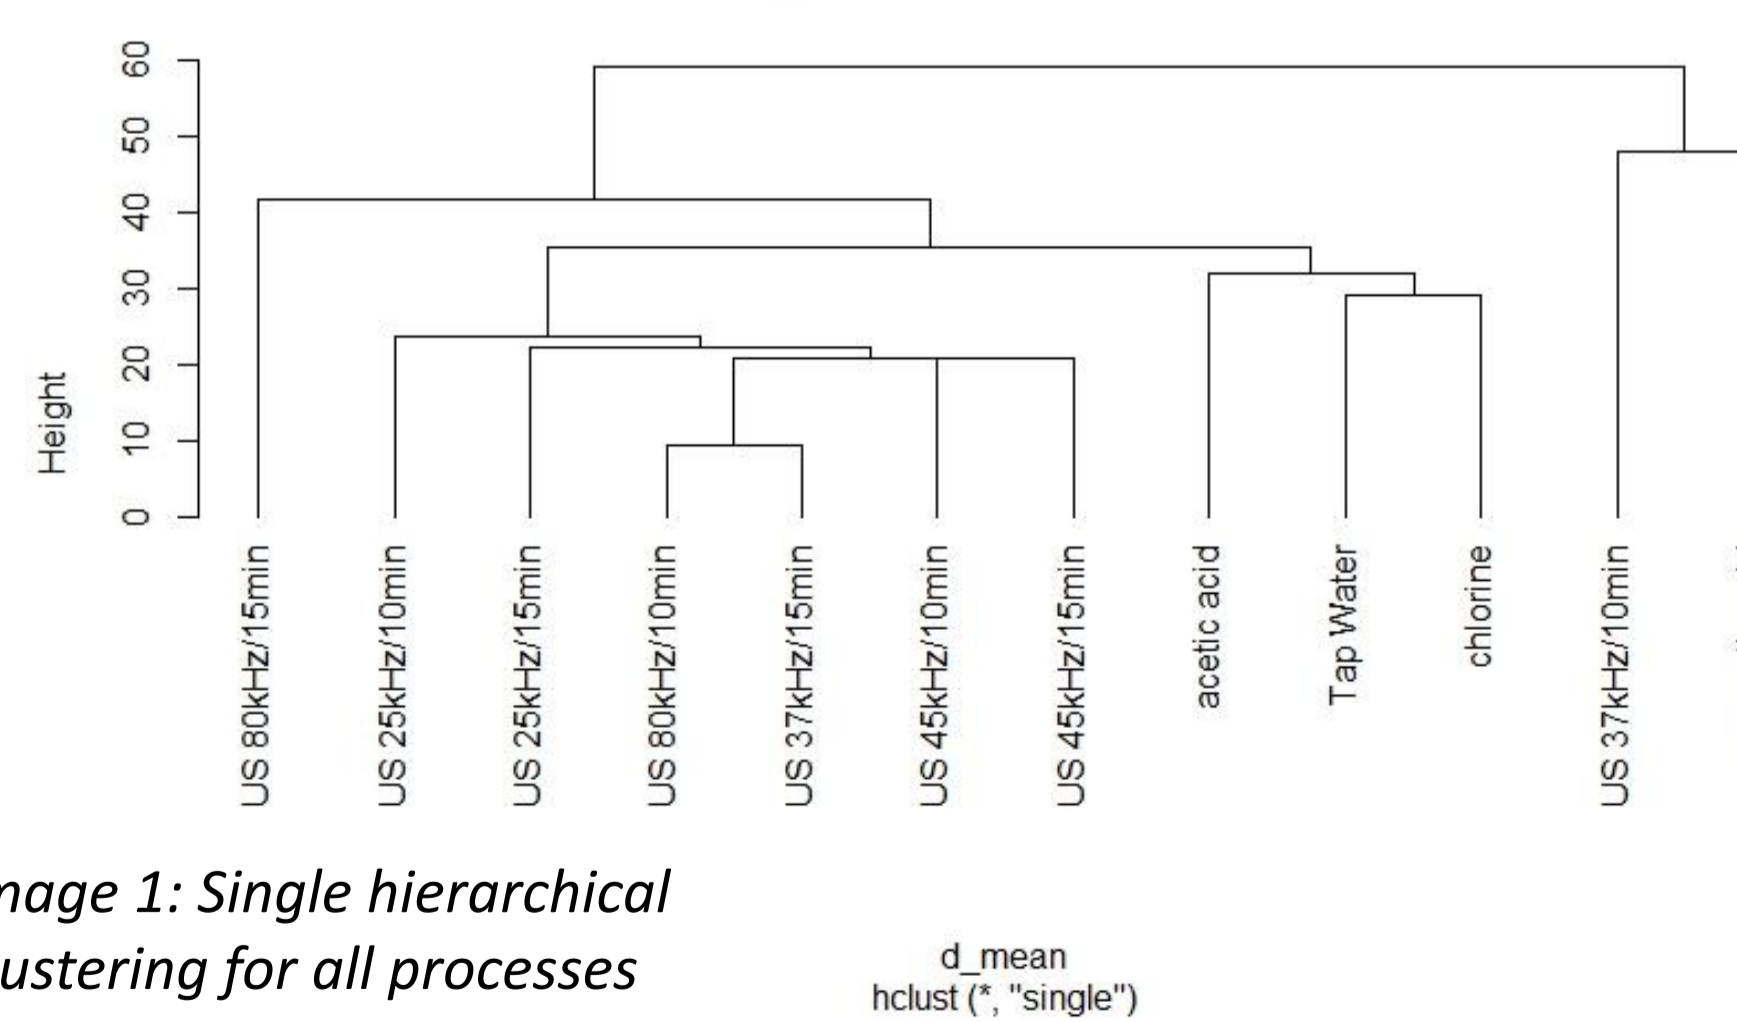

Image 1: Single hierarchical clustering for all processes

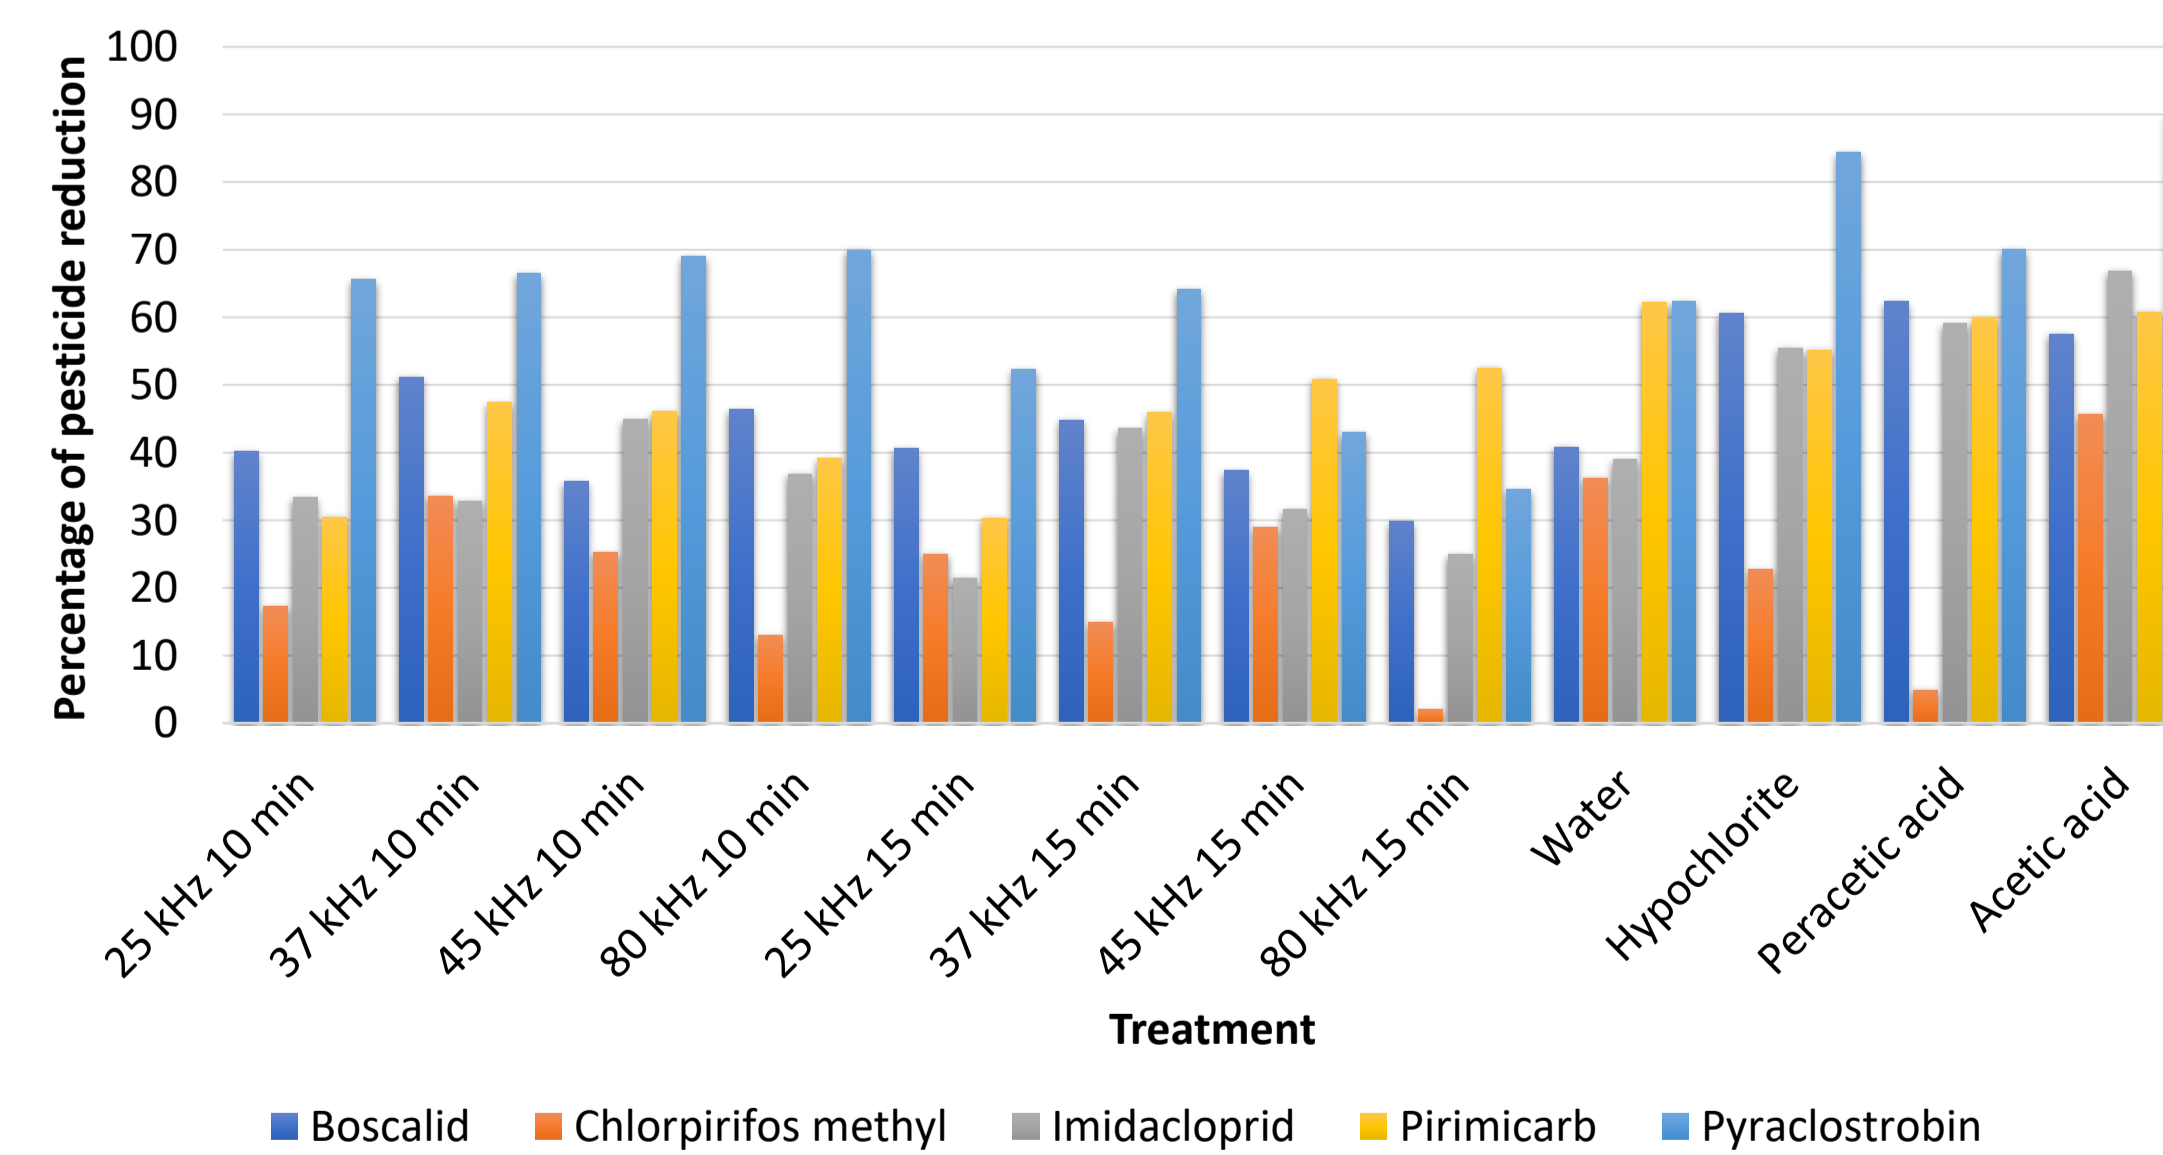

Graphic 1: Pesticide residue reduction for each treatment

## Conclusions and future work

- A fit for purpose methodology for the determination of pesticides residues in lettuce was developed and validated.
- The applicability of the method was tested in the analysis of 22 commercial samples, where seven showed pesticide residues
- No differences were found between the ultrasound treatments at the selected frequencies and times nor between them and the domestic treatments.
- All treatments managed to reduce pesticide residues, with chlorpyrifos methyl being the most resilient.

## References

- (1) Arienzo, M., Cataldo, D., & Ferrara, L. (2013). Pesticide residues in fresh-cut vegetables from integrated pest management by ultra performance liquid chromatography coupled to tandem mass spectrometry. Food Control, 31(1), 108–115.
- (2) Sannino, A., Bolzoni, L., & Bandini, M. (2004). Application of liquid chromatography with electrospray tandem mass spectrometry to the determination of a new generation of pesticides in processed fruits and vegetables, Journal of Chromatography A 1036, 161–169.
- (3) Khandpur, P., & Gogate, P. R. (2015). Effect of novel ultrasound based processing on the nutrition quality of different fruit and vegetable juices. Ultrasonics Sonochemistry, 27, 125–136.
- (4) <https://www.laguasata.com>
- (5) Codex Alimentarius Commission, Codex Pesticides Residues in Food Online Database, Updated up to and including its 36th Session (July 2013),

## Acknowledgements

CSIC PAIE, Universidad de la República for financing this project.  
To Agricultural Engineer Horacio Silva for his assessment on plague control.  
To producer Marcelo Chispens for his support, for providing us with the plants used and his knowledge regarding crop management.
